# Supplementary material
Source: PubMed Central journal article supplement (PMC5965301)
Supplement: glw246_suppl_supplemental_materials.pdf [file glw246_suppl_supplemental_materials.pdf]

Supplemental Figure 1. Negative Log-Likelihood Values for Estimating the Change Point Preceding the Development of AD and MCI among African Americans and European Americans

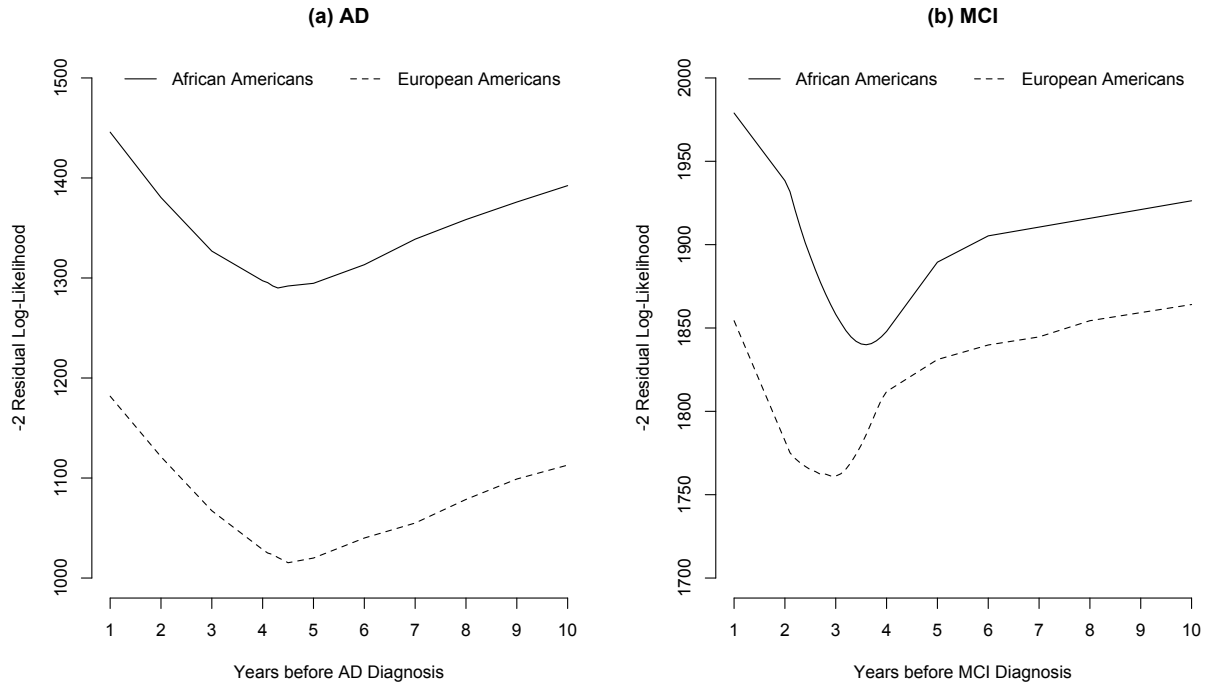

Supplemental Table 1. Linear Model-based and Change Point Model-based Estimates of Cognitive Decline (CD) among African Americans and European American Participants Adjusting for Mortality

|                                           | African Americans    | European Americans   |
|-------------------------------------------|----------------------|----------------------|
|                                           | Coefficient (95% CI) | Coefficient (95% CI) |
| Pre-change point AD Dementia Level        | 0.316 (.228, .404)   | 0.274 (.193, .354)   |
| Pre-change point MCI Level                | 0.140 (.067, .211)   | 0.098 (.036, .162)   |
| <b>Linear Model-based Estimates</b>       |                      |                      |
| CD – No Cognitive Impairment              | 0.016 (.012, .020)   | 0.021 (.017, .025)   |
| CD – Developing AD Dementia               | 0.098 (.084, .104)   | 0.160 (.142, .175)   |
| CD – Developing MCI                       | 0.036 (.029, .041)   | 0.055 (.048, .064)   |
| <b>Change Point Model-based Estimates</b> |                      |                      |
| Time of Change Prior to AD Dementia       | 4.3 years            | 4.7 years            |
| CD – before AD Dementia change point      | 0.013 (.009, .017)   | 0.020 (.016, .024)   |
| CD – after AD Dementia change point       | 0.172 (.154, .190)   | 0.236 (.212, .260)   |
| CD – after developing AD Dementia         | 0.178 (.147, .209)   | 0.235 (.188, .282)   |
| Time of Change Prior to MCI               | 3.6 years            | 3.0 years            |
| CD – before MCI change point              | 0.011 (.007, .015)   | 0.021 (.017, .025)   |
| CD – after MCI change point               | 0.085 (.068, .099)   | 0.103 (.087, .130)   |
| CD – after developing MCI                 | 0.105 (.092, .131)   | 0.118 (.088, .149)   |
